1 **Inhibition of host Lactate dehydrogenase A by a small-molecule limits *Mycobacterium***  
2 ***tuberculosis* growth and potentiates bactericidal activity of isoniazid.**

3 Gopinath Krishnamoorthy<sup>1\*</sup>, Peggy Kaiser<sup>1</sup>, Ulrike Abu Abed<sup>2</sup>, January Weiner 3rd<sup>1</sup>, Pedro  
4 Moura-Alves<sup>1,3</sup>, Volker Brinkmann<sup>2</sup>, Stefan H. E. Kaufmann<sup>1,4\*</sup>

5 <sup>1</sup>Department of Immunology, Max Planck Institute for Infection Biology, Berlin, Germany.

6 <sup>2</sup>Core Facility Microscopy, Max Planck Institute for Infection Biology, Berlin, Germany.

7 <sup>3</sup>Nuffield Department of Clinical Medicine, Ludwig Institute for Cancer Research, University of  
8 Oxford, Oxford, UK.

9 <sup>4</sup>Hagler Institute for Advanced Study at Texas A&M University, College Station, Texas, USA.

10 \*Address correspondence to Gopinath Krishnamoorthy ([krishnamoorthy@mpiib-berlin.mpg.de](mailto:krishnamoorthy@mpiib-berlin.mpg.de)),  
11 Stefan H. E. Kaufmann ([kaufmann@mpiib-berlin.mpg.de](mailto:kaufmann@mpiib-berlin.mpg.de)).

12

13 **ABSTRACT**

14 Lactate dehydrogenase A (LDHA) mediates interconversion of pyruvate and lactate. Increased  
15 lactate turnover is shared by malignant and immune cells. Hypoxic lung granuloma in  
16 *Mycobacterium tuberculosis*-infected animals present elevated levels of *Ldha* and lactate. Such  
17 alteration in metabolic milieu could influence the outcome of interactions between *M.*  
18 *tuberculosis* and its infected immune cells. Given the central role of LDHA for tumorigenicity,  
19 targeting lactate metabolism is a promising approach for cancer therapy. Here, we sought to  
20 determine the importance of LDHA for Tuberculosis (TB) disease progression and its potential as  
21 a host-directed therapeutic target. To this end, we administered FX11, a small-molecule NADH-  
22 competitive LDHA inhibitor, to *M. tuberculosis* infected C57BL/6J mice and *Nos2*<sup>-/-</sup> mice with  
23 hypoxic necrotizing lung TB lesions mimicking human pathology more closely. FX11 did not  
24 inhibit *M. tuberculosis* growth in aerobic/hypoxic liquid culture, but modestly reduced the  
25 pulmonary bacterial burden in C57BL/6J mice. Intriguingly, FX11 administration limited *M.*  
26 *tuberculosis* replication and onset of necrotic lesions in *Nos2*<sup>-/-</sup> mice. In this model, Isoniazid  
27 (INH) monotherapy has been known to exhibit biphasic killing kinetics owing to the probable  
28 selection of an INH-tolerant subpopulation. This adverse effect was corrected by adjunct FX11  
29 treatment and augmented the INH-derived bactericidal effect against *M. tuberculosis*. Our  
30 findings therefore support LDHA as a potential target for host-directed adjunctive TB therapy  
31 and encourage further investigations into the underlying mechanism.

32 **IMPORTANCE**

33 Tuberculosis (TB) continues to be a global health threat of critical dimension.  
34 Standard TB drug treatment is prolonged and cumbersome. Inappropriate treatment or non-  
35 compliance results in emergence of drug-resistant *Mycobacterium tuberculosis* strains (MDR-

36 TB) that render current treatment options ineffective. Targeting the host immune system as  
37 adjunct therapy to augment bacterial clearance is attractive as it is also expected to be effective  
38 against MDR-TB. Here, we provide evidence that pharmaceutical blockade of host lactate  
39 dehydrogenase A (LDHA) by a small-molecule limits *M. tuberculosis* growth and reduces  
40 pathology. Notably, LDHA inhibition potentiates the effect of Isoniazid, a first-line anti-TB  
41 drug. Hence, its implications of our findings for short-term TB treatment are profound. In sum,  
42 our findings establish murine LDHA as a potential target for host-directed TB therapy.

### 43 **INTRODUCTION**

44 Tuberculosis (TB) is the leading cause of mortality from an infectious agent  
45 globally (1) and its treatment includes six-month long therapy with combinations of drugs.  
46 Development of newer drugs with superior efficacy and safety is urgently required to shorten the  
47 treatment duration as well as to manage drug-resistant TB effectively. Pathogen-targeted  
48 treatment is the preferred choice, however, host-directed approaches are being increasingly  
49 recognized for adjunct therapy to reduce pathogen load and ameliorate exacerbated organ damage  
50 during TB granuloma progression (2, 3). Radiotracer imaging of *M. tuberculosis*-infected lungs  
51 has revealed heterogeneity – in size, metabolism, and infection – within and between granulomas  
52 in a single host (4, 5). In general, the significance of metabolic processes on immune functions is  
53 increasingly accepted (6-8). Heterogeneous responses in granuloma, therefore, could partly be  
54 attributed to metabolic state(s)/energy phenotype(s) of different immune cells (e.g., macrophages,  
55 neutrophils, lymphocytes) that are influenced by their microenvironment and local infection  
56 dynamics. Understanding of pathogen-induced immunometabolic dysregulation in granuloma can  
57 provide insights into the vital pathways in the infected host and thereby reveal novel therapeutic  
58 target candidates.

59                   Untargeted metabolite analysis has identified elevated levels of lactate in necrotic  
60 granuloma of *M. tuberculosis*-infected guinea pigs (9). Generation of lactate from pyruvate, a  
61 terminal glycolytic step, is catalyzed by lactate dehydrogenase A (LDHA), whose functions  
62 depend on hypoxia-inducible factors (HIFs) (10). Both LDHA and HIF1- $\alpha$  transcripts have been  
63 found to be significantly induced in *M. tuberculosis*-infected mouse lungs (11, 12), and the  
64 essential function of HIF1- $\alpha$  in controlling TB progression has already been recognized (10).  
65 Although metabolic phenotypes of malignant and immune cells show some critical differences,  
66 they present many similarities (13). In most cancer cells, aerobic glycolysis (Warburg effect) or  
67 hypoxia adaptation requires LDHA, and its inactivation using the NADH competitive inhibitor,  
68 FX11 (3-dihydroxy-6-methyl-7-(phenylmethyl)-4-propylnaphthalene-1-carboxylic acid;  
69 PubChem CID: 10498042), has been shown to regress lymphoma and pancreatic cancer (14). In  
70 this report, we interrogate whether FX11-mediated LDHA inhibition could result in host-  
71 beneficial and pathogen-detrimental outcome in murine TB models and its relevance to host-  
72 directed therapy.

### 73 **FINDINGS**

74                   FX11 affects bioenergetics and glycolysis in human Panc (P) 493 B-lymphoid cells  
75 (14). Here, we assessed the FX11-induced response in interferon-gamma (IFN- $\gamma$ ) stimulated but  
76 uninfected murine bone marrow derived macrophages (BMDMs) (**Methods in Text S1**). FX11  
77 addition increased the oxygen consumption rate (OCR), but decreased the respiratory capacity,  
78 membrane potential, and ATP synthesis in a concentration-dependent manner (**Fig. 1A and B**;  
79 **Text S2**). Essentially, FX11 (at 14.3  $\mu$ M) uncoupled the mitochondrial respiratory chain and  
80 phosphorylation system. Likewise, FX11-mediated LDHA inhibition increased the extracellular  
81 acidification rate (ECAR) (implying increased glycolysis) but depleted the cellular glycolytic

82 reserve (**Fig. 1C and D**). Such FX11-dependent glycolytic induction could be argued, in part, as  
83 a measure to compensate the reduced mitochondrial energy generation. Nevertheless, these  
84 observations establish that FX11-mediated LDHA inhibition profoundly affects bioenergetics and  
85 glycolysis in BMDMs. Intriguingly, recent studies have demonstrated that energy-flux changes in  
86 macrophages depend on viability and virulence of *M. tuberculosis* (15, 16). Upon virulent *M.*  
87 *tuberculosis* infection, human monocyte-derived macrophages shift their energy generation to  
88 mitochondrial fatty acid oxidation with concomitant decrease in glycolysis (16). We interrogated  
89 whether FX11-mediated impairment of respiratory/glycolytic function directly affects the  
90 intramacrophage *M. tuberculosis* survival. Because high concentration of FX11 affected viability  
91 of BMDMs, we tested 1.43  $\mu$ M concentration and the bacterial survival remained identical  
92 between untreated and FX11-treated conditions (**Fig. 1E**).

93           Although FX11 is an analog of anti-bacterial gossypol (17), we found that FX11 is  
94 non-toxic to *M. tuberculosis* under the tested conditions. The aerobic growth of *M. tuberculosis*  
95 in glycerol or sodium L-lactate was comparable between FX11-treated and untreated growth  
96 control (**Fig. 1F and G**). Similarly, fluorescence measurement of green fluorescent protein  
97 expressing *M. tuberculosis*, as a function of growth, under 1% O<sub>2</sub> hypoxia revealed that FX11 did  
98 not affect the bacterial viability, albeit a minor decrement in fluorescence was noted (**Fig. S1A**  
99 **and B**). Moreover, development of a pale brownish color in FX11-supplemented hypoxic culture  
100 only was noted suggesting that this small-molecule is differentially metabolized under such  
101 condition. Finally, the respiratory functions in *M. tuberculosis* also remained unperturbed when  
102 FX11 was added (**Fig. 1H**). We conclude that the bioenergetics effects of FX11 are highly host-  
103 specific.

104

105

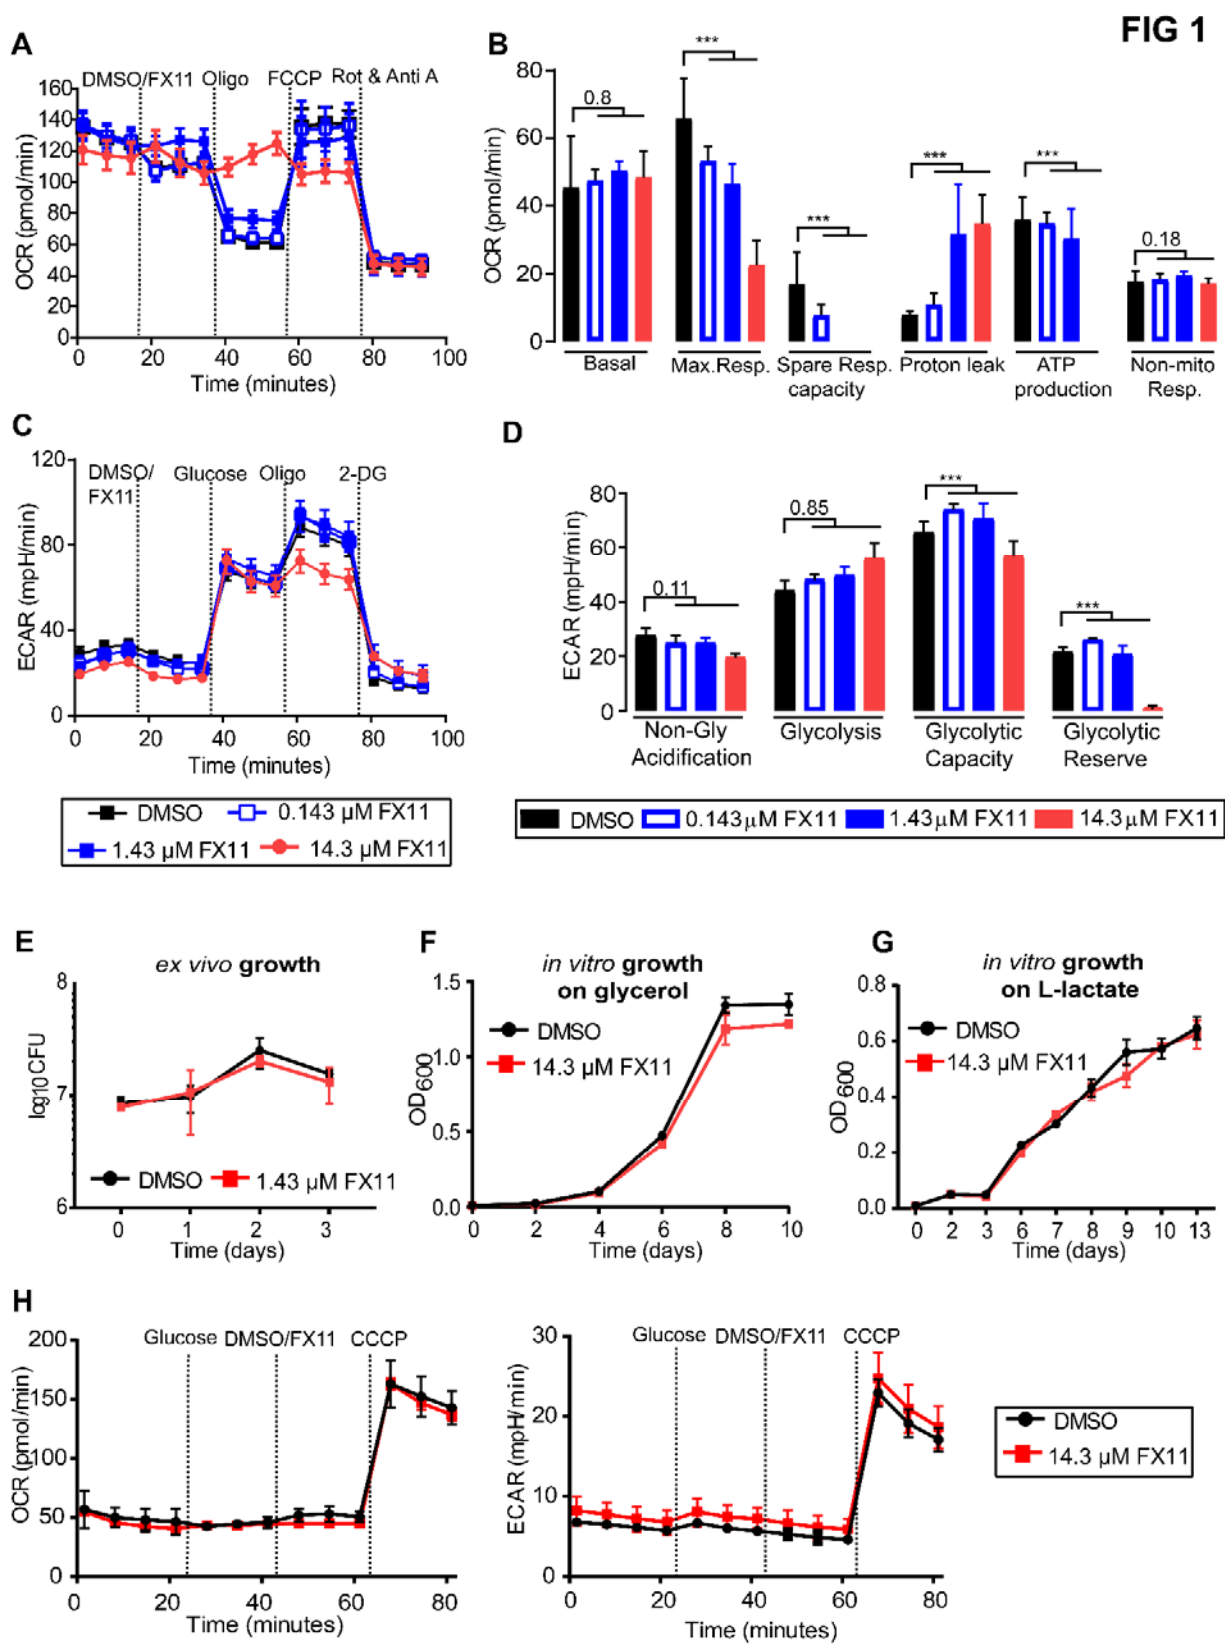

107 **FIG 1. FX11-induced metabolic changes are highly host-specific.** FX11 alters the (A-B)  
 108 respiratory profile and parameters, (C) glycolytic parameters, and (D) glycolytic proton efflux  
 109 rate (PER) of IFN- $\gamma$ -stimulated murine bone marrow-derived macrophages (BMDMs) in a  
 110 concentration-dependent manner. Wells with DMSO served as control. Different mitochondrial  
 111 and glycolytic modulators were sequentially injected and cellular responses (OCR and ECAR  
 112 values) were measured using Seahorse XF analyzer. Data represent three independent  
 113 experiments. A regression model was performed to determine the dose-response effect of FX11  
 114 on BMDM metabolic parameters using the pooled data from three independent experiments \*, P  
 115 >0.001; \*\*\*, P >0.0001 (see **Text S2**). (E) IFN- $\gamma$ -stimulated BMDMs infected with *M.*  
 116 *tuberculosis* H37Rv at multiplicity of infection 1:5, with FX11 effect determined by enumerating  
 117 viable bacterial counts. Effect of FX11 on *M. tuberculosis* growth in liquid medium containing  
 118 (F) 0.2% v/v glycerol or (G) 10 mM sodium L-lactate as the sole carbon source. (H) Effect of  
 119 FX11 *M. tuberculosis* respiratory function (OCR and ECAR values) measured by Seahorse XFp  
 120 extracellular flux analyzer.

121

**FIG S1**

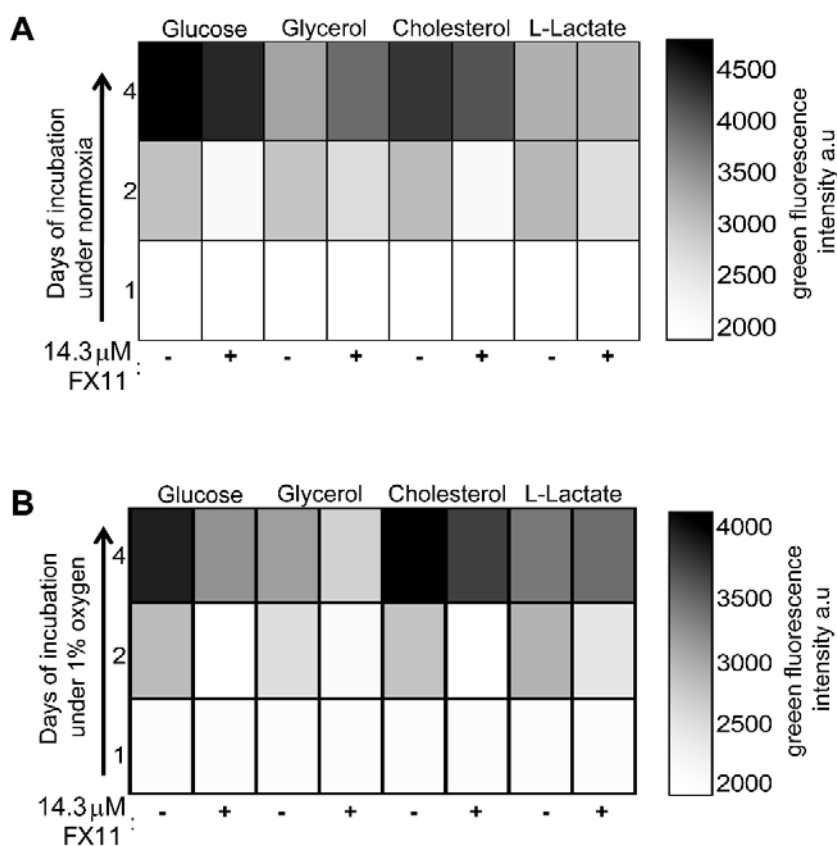

122

123 **FIG S1. Effects of FX11 on bacterial growth.** (A-B) Gradient color map showing the  
 124 fluorescence intensity of green fluorescence protein expressing *M. tuberculosis* strain. Liquid  
 125 culture in medium containing specified carbon sources and incubated under aerobic or hypoxic  
 126 growth condition at 37<sup>o</sup> C.

127 Subsequently, the effect of FX11 was evaluated in two murine TB models. In a first  
128 experiment, C57BL/6J mice were aerosol-infected with 100 CFU of *M. tuberculosis* H37Rv. At 4  
129 weeks post-infection, mice received either FX11 (2 mg/kg) or 2% (final concentration) dimethyl  
130 sulfoxide (DMSO) as placebo by oral gavage (6 days/week) for further 4 weeks. Post-treatment  
131 effect was monitored at 2 and 4 weeks by enumerating CFU from excised lungs and spleens of  
132 euthanized animals. FX11 administration resulted in approximately 0.5 log<sub>10</sub> reduction in  
133 pulmonary *M. tuberculosis* counts (**Fig. 2A; Fig. S2A**) with less apparent effect on splenic CFU.  
134 Administered dose of FX11 is similar to those in a previous study (14), and further dose  
135 increment is restricted due to poor compound solubility. Furthermore, complete inhibition of  
136 LDHA could result in adverse events as it is essential for cellular homeostasis.

137 TB granulomas in C57BL/6J mice rarely progress into necrosis, whereas *Nos2*<sup>-/-</sup> mice  
138 present hypoxic necrotizing lung lesions that are characteristics hallmarks of human TB (18-20).  
139 Therefore, in a second experiment, the effect of FX11 (2 mg/kg), either individually or in  
140 combination with isoniazid (INH, 25 mg/kg), was evaluated in *Nos2*<sup>-/-</sup> mice (**Fig. 2B**). Efficacy  
141 was determined by assessing histopathology and bacterial viability. FX11 administration was  
142 apparently well-tolerated because treated animals showed no increased distress or weight loss  
143 (**Fig. S2B**). As previously observed (20), onset of hypoxic and necrotic lesions became apparent  
144 at day 56 (at treatment start). Although the number and size of lesions were comparable, further  
145 development of necrotic lesions were ceased in the FX11-treated group (**Fig. 2C,D; Fig. S2C,**  
146 **D**). Likewise, 2 or 4 weeks of FX11 administration limited further bacterial growth in lungs and  
147 spleens. Immunofluorescence staining of paraffin-embedded lung sections revealed that LDHA  
148 expression co-localized with hypoxic lesions (**Fig. 2C; Fig. S3**). Nonetheless, FX11  
149 administration had no apparent impact on LDHA immunofluorescence which is probably due to  
150 non-inhibitory effects of FX11 on transcription/translation. Moreover, enzymatic quantification



151 of lactate from the excised lung tissues presented erroneous and irreproducible data (data not  
152 shown). Thus, no concrete evidence could be presented to corroborate the *in vivo* inhibitory effect  
153 of FX11 on LDHA.

154 Necrotic lesions in the *Nos2*<sup>-/-</sup> model have been correlated with the evolution of slow/non-  
155 growing INH-tolerant subpopulation (20). Accordingly, we interrogated whether FX11-mediated  
156 inhibition of progression to necrotic granuloma potentiates INH efficacy possibly by preventing  
157 the emergence of the drug-tolerant population. Indeed, the combination of FX11 and INH  
158 resulted in superior efficacy, and there was no further cessation of bactericidal activity of INH,  
159 when compared with monotherapy (**Fig. 2B**). While this observation requires further validation in  
160 other experimental models, it has immense implications for shortening TB treatment and  
161 minimizing the risk of emergence of drug resistance in *M. tuberculosis*.

162

163

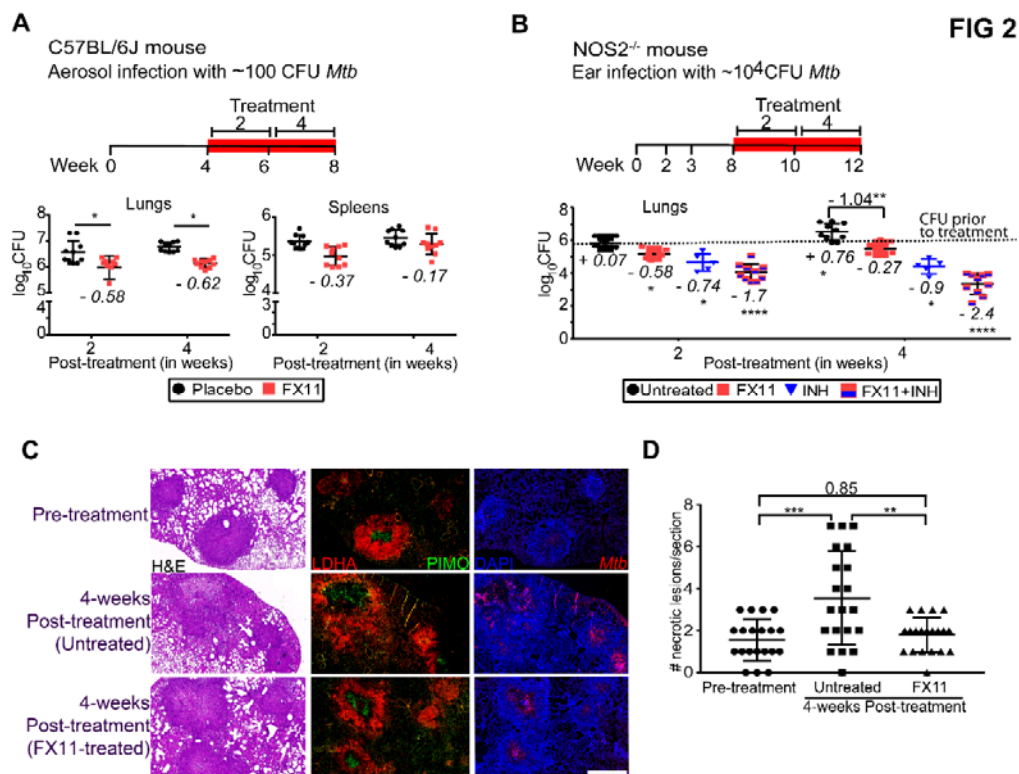

164

165 **FIG 2. Evaluation of FX11 effects against *M. tuberculosis* in mouse models.** (A) Schematic  
 166 representation of experimental design (treatment duration is highlighted in red). Effect of FX11  
 167 (2 mg/kg) on bacterial burden in C57BL/6J mice aerosol infected with 100 CFU *M. tuberculosis*.  
 168 Datasets presented are from 2 independent experiments (n = 10). Values shown are  
 169 means±standard deviation (SD). Italicized numerical value (in negative) represents reduction in  
 170 log<sub>10</sub>CFU in the treated group, when compared with the placebo control group. Statistical  
 171 significance was evaluated by using an unpaired Student *t* test. \*p<0.05. (B) Effect of FX11 (2  
 172 mg/kg) as monotherapy or in combination with INH (25 mg/kg) in Nos2<sup>-/-</sup> mice with hypoxic  
 173 necrotizing lung lesions (20). The TNF-α response was neutralized at 2 and 3 weeks of post-  
 174 infection. Drugs were administered after onset of central necrosis and hypoxia in lung lesions at  
 175 day 56. Untreated or INH-treated (n = 5) groups were used for comparisons. Lung CFU data  
 176 (means±SD) from two independent experiments (n = 9–10) are shown. Italicized numerical value  
 177 represents log<sub>10</sub>CFU differences (an increase is indicated as positive value and a decrease is in  
 178 negative integer) of the specified group, when compared with the control group prior to drug  
 179 treatment (i.e. day 56, indicated in dotted line). Pooled data from two independent experiments  
 180 were analyzed using nonparametric Mann-Whitney test (data that did not pass the Shapiro-Wilk  
 181 normality test). Statistical significance as compared to the group prior to drug treatment, \*p<0.05,  
 182 \*\*p<0.01, \*\*\*\*p<0.0001. (C) Hematoxylin and eosin (H&E) staining and immunofluorescence  
 183 detection of *M. tuberculosis* or hypoxia marker pimonidazole (PIMO) and LDHA. Magnified  
 184 images show the co-localized staining of LDHA and PIMO in lung lesion. Scale bar represents 1  
 185 mm. Micrographs of a stained section of whole left lung lobe are presented in **Fig. S3**. (D) Total  
 186 number (means±SD) of necrotizing lesions present in Nos2<sup>-/-</sup> mice that were either untreated or  
 187 FX11-treated. Data were analyzed using two-way ANOVA with multicomparison and Tukey's  
 188 post-test. Statistical significance as compared to the control group prior to drug treatment, n=5,  
 189 \*\*p<0.01, \*\*\*p<0.001.

**FIG S2**

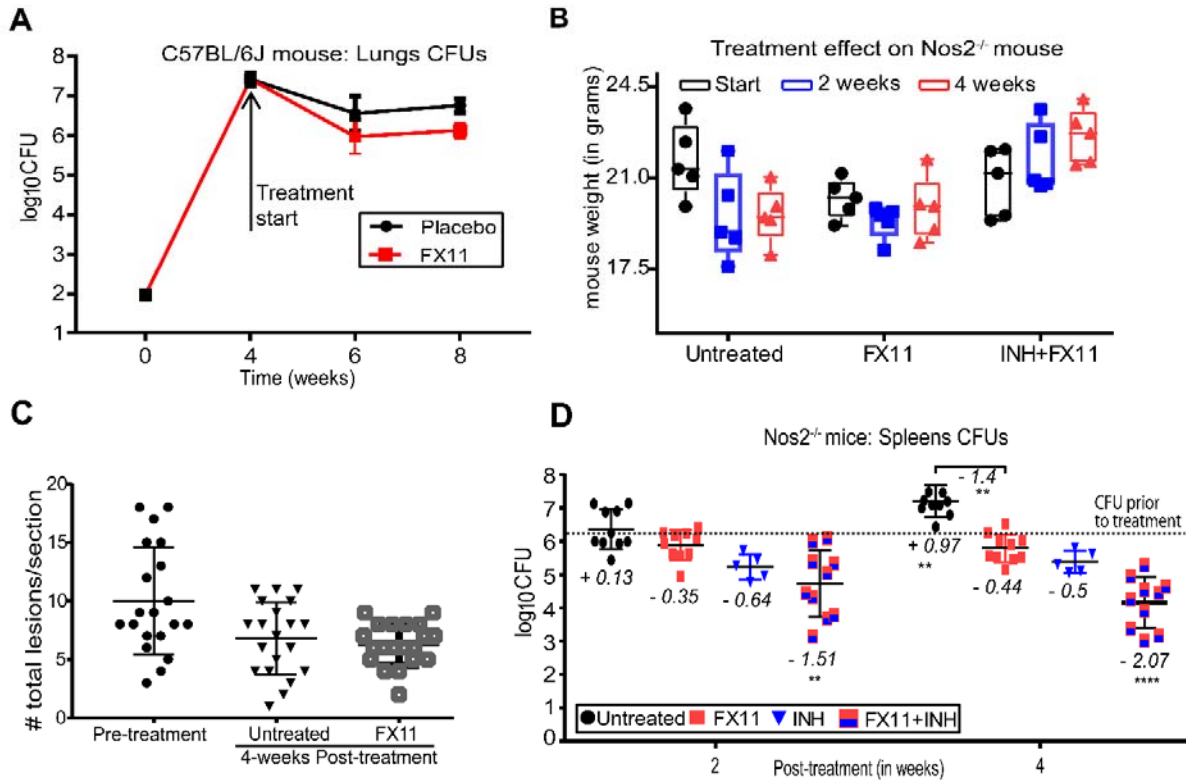

190

191 **FIG S2. Effects of FX11 administration into mouse models.** (A) Bacterial burden in C57BL/6J  
 192 lungs are shown at respective time points. (B) Body weight of untreated and drug-treated *Nos2*<sup>-/-</sup>  
 193 mice. (C) Total number of lesions (necrotic and non-necrotic) per lung section of *Nos2*<sup>-/-</sup> mouse  
 194 groups. (D) Splenic CFU data (means±SD) from two independent experiments (n = 9–10).  
 195 Italicized numerical value represents  $\log_{10}$ CFU differences (increase in CFU is indicated as  
 196 positive value and decrease is indicated as negative value) of the specified group, when compared  
 197 with the control group prior to drug treatment (i.e. day 56, indicated in dotted line). Pooled data  
 198 from two independent experiments were analyzed using nonparametric Mann-Whitney test (data  
 199 that did not pass the Shapiro-Wilk normality test). Statistical significance as compared to the  
 200 group prior to drug treatment, \*p<0.05, \*\*p<0.01, \*\*\*\*p<0.0001.

201

202 Genetic ablation of LDHA in T cells has been found to protect mice from IFN- $\gamma$ -mediated  
 203 lethal pathology of autoimmune responses (21). Similarly, lactate accumulation has been  
 204 indicated to severely impair IFN- $\gamma$ -dependent tumor immunosurveillance (22). It is a well-  
 205 established paradigm that IFN- $\gamma$  has a central role in macrophage activation and tissue-protection

206 in TB (23, 24). Besides, HIF-1 $\alpha$  is not only a transcriptional regulator of LDHA, but also  
207 coordinates IFN- $\gamma$ -dependent adaptive immunity to *M. tuberculosis* (10). It has been reported that  
208 IL-17 limits HIF1 $\alpha$  expression (and lactate accumulation) and hypoxic necrotic granuloma  
209 development in C3HeB/FeJ mice infected with an *M. tuberculosis* clinical isolate (12). Thus,  
210 LDHA inhibition resulting in heightened IL-17 activity and/or reduced IFN- $\gamma$ -dependent  
211 exacerbated inflammation could explain the FX11-limited necrotic granuloma progression in the  
212 *Nos2*<sup>-/-</sup> mouse model. However, the cause of reduction in *M. tuberculosis* burden upon FX11  
213 treatment is difficult to explain. FX11-mediated LDHA inhibition perhaps alters the balance of  
214 pro- and anti-inflammatory cytokines thereby contributing to *M. tuberculosis* clearance (25).  
215 Observed FX11 effects can also be linked to factors other than LDHA inhibition. E.g., reactive  
216 catechol moiety of FX11 or its drug-intermediates (under oxygen limiting conditions) could  
217 cause off-target effects. FX11 has been shown to induce oxidative stress (14), which could  
218 restrict bacterial growth and augment INH efficacy against *M. tuberculosis*. Finally, FX11  
219 administration could deprive *M. tuberculosis* from utilizing host-derived lactate for energy  
220 generation (26). Therefore, in depth analysis of mechanism underlying LDHA inhibition and  
221 pathogen clearance is warranted as it is a promising host-directed therapy approach in adjunct to  
222 canonical drug treatment.

223

224

225

226

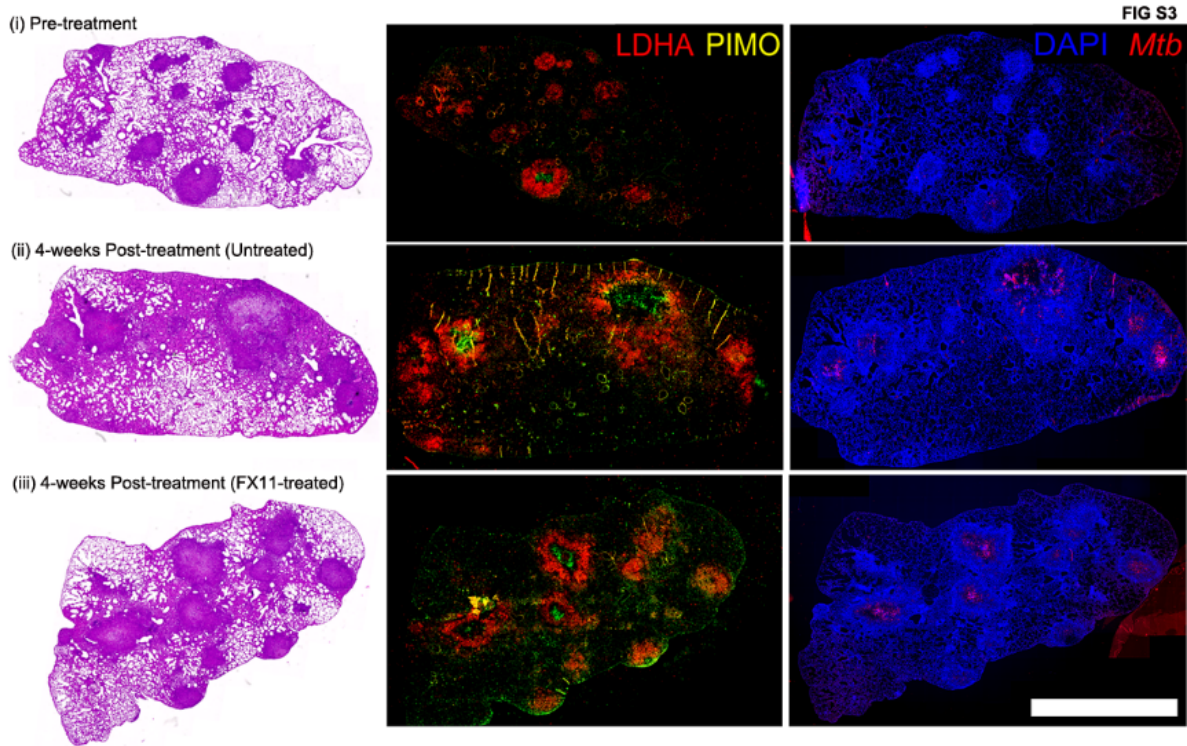

227

228 **FIG S3. Staining of whole lung section from *Nos2*<sup>-/-</sup> mice.** Micrographs of stained consecutive  
229 thin sections of the fixed and paraffin-embedded left lung lobe. Scale bar represents 2.5 mm.

230

### 231 ACKNOWLEDGEMENTS

232 Animal protocols were approved by Landesamt für Gesundheit und Soziales,  
233 Berlin, Germany. Experiments were conducted in accordance with the European directive  
234 2010/63/EU on Care, Welfare and Treatment of Animals.

235 We thank Manuela Primke, Ines Neumann, Jens Otto, Uwe Klemm, and Gesa  
236 Rausch for their help in mouse breeding and maintenance; Marion Klemm, Manuela Stäber and  
237 Dagmar Oberbeck-Mueller for technical assistance. We gratefully acknowledge the partial  
238 financial support (to S.H.E.K) from “PreDiCT-TB” and the intramural funding of Max Planck  
239 Society to S.H.E.K.

## 240 REFERENCES

- 241 1. WHO. 2018. Global tuberculosis report 2018. World Health Organization, Geneva,  
242 Switzerland. [https://www.who.int/tb/publications/global\\_report/en/](https://www.who.int/tb/publications/global_report/en/).
- 243 2. Kaufmann SH, Dorhoi A, Hotchkiss RS, Bartenschlager R. 2018. Host-directed therapies  
244 for bacterial and viral infections. *Nat Rev Drug Discov* 17:35-56.  
245 <https://doi.org/10.1038/nrd.2017.162>.
- 246 3. Dorhoi A, Kaufmann SH. 2016. Pathology and immune reactivity: understanding  
247 multidimensionality in pulmonary tuberculosis. *Semin Immunopathol* 38:153-166.  
248 <https://doi.org/10.1007/s00281-015-0531-3>.
- 249 4. Lin PL, Ford CB, Coleman MT, Myers AJ, Gawande R, Ioerger T, Sacchettini J, Fortune  
250 SM, Flynn JL. 2014. Sterilization of granulomas is common in active and latent  
251 tuberculosis despite within-host variability in bacterial killing. *Nat Med* 20:75-79.  
252 <https://doi.org/10.1038/nm.3412>.
- 253 5. Lenaerts A, Barry III CE, Dartois V. 2015. Heterogeneity in tuberculosis pathology,  
254 microenvironments and therapeutic responses. *Immunol Rev* 264:288-307.  
255 <https://doi.org/10.1111/imr.12252>.
- 256 6. Olive AJ, Sasseti CM. 2016. Metabolic crosstalk between host and pathogen: sensing,  
257 adapting and competing. *Nat Rev Microbiol* 14:221-234.  
258 <https://doi.org/10.1038/nrmicro.2016.12>.
- 259 7. Kiran D, Podell BK, Chambers M, Basaraba RJ. 2016. Host-directed therapy targeting the  
260 *Mycobacterium tuberculosis* granuloma: a review. *Semin Immunopathol* 38:167-183.  
261 <https://doi.org/10.1007/s00281-015-0537-x>.
- 262 8. Eisenreich W, Rudel T, Heesemann J, Goebel W. 2017. To eat and to be eaten: mutual  
263 metabolic adaptations of immune cells and intracellular bacterial pathogens upon  
264 infection. *Front Cell Infect Microbiol* 7:316. <https://doi.org/10.3389/fcimb.2017.00316>.
- 265 9. Somashekar B, Amin AG, Rithner CD, Trout J, Basaraba R, Izzo A, Crick DC,  
266 Chatterjee D. 2011. Metabolic profiling of lung granuloma in *Mycobacterium*  
267 *tuberculosis* infected guinea pigs: ex vivo 1H magic angle spinning NMR studies. *J*  
268 *Proteome Res* 10:4186-4195. <https://doi.org/10.1021/pr2003352>.
- 269 10. Braverman J, Sogi KM, Benjamin D, Nomura DK, Stanley SA. 2016. HIF-1 $\alpha$  is an  
270 essential mediator of IFN- $\gamma$ -dependent immunity to *Mycobacterium tuberculosis*. *J*  
271 *Immunol* 197:1287-1297. <https://doi.org/10.4049/jimmunol.1600266>.
- 272 11. Shi L, Salamon H, Eugenin EA, Pine R, Cooper A, Gennaro ML. 2015. Infection with  
273 *Mycobacterium tuberculosis* induces the Warburg effect in mouse lungs. *Sci Rep* 5:18176.  
274 <https://doi.org/10.1038/srep18176>.
- 275 12. Domingo-Gonzalez R, Das S, Griffiths KL, Ahmed M, Bambouskova M, Gopal R, Gondi  
276 S, Muñoz-Torrico M, Salazar-Lezama MA, Cruz-Lagunas A. 2017. Interleukin-17 limits  
277 hypoxia-inducible factor 1 $\alpha$  and development of hypoxic granulomas during tuberculosis.  
278 *JCI Insight* 2:92973. <https://doi.org/10.1172/jci.insight.92973>.
- 279 13. Andrejeva G, Rathmell JC. 2017. Similarities and distinctions of cancer and immune  
280 metabolism in inflammation and tumors. *Cell Metab* 26:49-70.  
281 <https://doi.org/10.1016/j.cmet.2017.06.004>.
- 282 14. Le A, Cooper CR, Gouw AM, Dinavahi R, Maitra A, Deck LM, Royer RE, Vander Jagt  
283 DL, Semenza GL, Dang CV. 2010. Inhibition of lactate dehydrogenase A induces  
284 oxidative stress and inhibits tumor progression. *Proc Natl Acad Sci U S A* 107:2037-2042.  
285 <https://doi.org/10.1073/pnas.0914433107>.

- 286 15. Lachmandas E, Beigier-Bompadre M, Cheng SC, Kumar V, van Laarhoven A, Wang X,  
287 Ammerdorffer A, Boutens L, de Jong D, Kanneganti TD, Gresnigt MS, Ottenhoff TH,  
288 Joosten LA, Stienstra R, Wijmenga C, Kaufmann SH, van Crevel R, Netea MG. 2016.  
289 Rewiring cellular metabolism via the AKT/mTOR pathway contributes to host defence  
290 against *Mycobacterium tuberculosis* in human and murine cells. *Eur J Immunol* 46:2574-  
291 2586. <https://doi.org/10.1002/eji.201546259>.
- 292 16. Cumming BM, Addicott KW, Adamson JH, Steyn AJ. 2018. *Mycobacterium tuberculosis*  
293 induces decelerated bioenergetic metabolism in human macrophages. *eLife* 7:e39169.  
294 <https://doi.org/10.7554/eLife.39169>.
- 295 17. Margalith P. 1967. Inhibitory effect of gossypol on microorganisms. *Appl Microbiol*  
296 15:952-953.
- 297 18. Reece ST, Loddenkemper C, Askew DJ, Zedler U, Schommer-Leitner S, Stein M, Mir  
298 FA, Dorhoi A, Mollenkopf HJ, Silverman GA, Kaufmann SH. 2010. Serine protease  
299 activity contributes to control of *Mycobacterium tuberculosis* in hypoxic lung granulomas  
300 in mice. *J Clin Invest* 120:3365-3376. <https://doi.org/10.1172/JCI42796>.
- 301 19. Duque-Correa MA, Kuhl AA, Rodriguez PC, Zedler U, Schommer-Leitner S, Rao M,  
302 Weiner J, 3rd, Hurwitz R, Qualls JE, Kosmiadi GA, Murray PJ, Kaufmann SH, Reece ST.  
303 2014. Macrophage arginase-1 controls bacterial growth and pathology in hypoxic  
304 tuberculosis granulomas. *Proc Natl Acad Sci U S A* 111:E4024-32.  
305 <https://doi.org/10.1073/pnas.1408839111>.
- 306 20. Gengenbacher M, Duque-Correa MA, Kaiser P, Schuerer S, Lazar D, Zedler U, Reece  
307 ST, Nayyar A, Cole ST, Makarov V, Barry Iii CE, Dartois V, Kaufmann SHE. 2017.  
308 NOS2-deficient mice with hypoxic necrotizing lung lesions predict outcomes of  
309 tuberculosis chemotherapy in humans. *Sci Rep* 7:8853. [https://doi.org/10.1038/s41598-  
310 017-09177-2](https://doi.org/10.1038/s41598-017-09177-2).
- 311 21. Peng M, Yin N, Chhangawala S, Xu K, Leslie CS, Li MO. 2016. Aerobic glycolysis  
312 promotes T helper 1 cell differentiation through an epigenetic mechanism. *Science*  
313 354:481-484. <https://doi.org/10.1126/science.aaf6284>.
- 314 22. Brand A, Singer K, Koehl GE, Kolitzus M, Schoenhammer G, Thiel A, Matos C, Bruss C,  
315 Klobuch S, Peter K, Kastenberger M, Bogdan C, Schleicher U, Mackensen A, Ullrich E,  
316 Fichtner-Feigl S, Kesselring R, Mack M, Ritter U, Schmid M, Blank C, Dettmer K,  
317 Oefner PJ, Hoffmann P, Walenta S, Geissler EK, Pouyssegur J, Villunger A, Steven A,  
318 Seliger B, Schreml S, Haferkamp S, Kohl E, Karrer S, Berneburg M, Herr W, Mueller-  
319 Klieser W, Renner K, Kreutz M. 2016. LDHA-Associated Lactic Acid Production Blunts  
320 Tumor Immunosurveillance by T and NK Cells. *Cell Metab* 24:657-671.  
321 <https://doi.org/10.1016/j.cmet.2016.08.011>.
- 322 23. Mishra BB, Rathinam VA, Martens GW, Martinot AJ, Kornfeld H, Fitzgerald KA,  
323 Sassetti CM. 2013. Nitric oxide controls the immunopathology of tuberculosis by  
324 inhibiting NLRP3 inflammasome-dependent processing of IL-1 $\beta$ . *Nat Immunol* 14:52-60.  
325 <https://doi.org/10.1038/ni.2474>.
- 326 24. Pagán AJ, Ramakrishnan L. 2018. The formation and function of granulomas. *Annu Rev*  
327 *Immunol* 36:639-665. <https://doi.org/10.1146/annurev-immunol-032712-100022>.
- 328 25. Gideon HP, Phuah J, Myers AJ, Bryson BD, Rodgers MA, Coleman MT, Maiello P,  
329 Rutledge T, Marino S, Fortune SM. 2015. Variability in tuberculosis granuloma T cell  
330 responses exists, but a balance of pro-and anti-inflammatory cytokines is associated with  
331 sterilization. *PLoS Pathog* 11:e1004603. <https://doi.org/10.1371/journal.ppat.1004603>.

- 332 26. Billig S, Schneefeld M, Huber C, Grassl GA, Eisenreich W, Bange F-C. 2017. Lactate  
333 oxidation facilitates growth of *Mycobacterium tuberculosis* in human macrophages. *Sci*  
334 *Rep* 7:6484. <https://doi.org/10.1038/s41598-017-05916-7>.

335

336



337 **TEXT S1. Supplementary material and methods.**

338 **Bacterial strains.** *M. tuberculosis* H37Rv (American Type Culture Collection, #27294) or its  
339 derivative expressing pGFPHYG2 replicative plasmid (kind gift from Lalita Ramakrishnan;  
340 Addgene# 30173) was grown in Middlebrook 7H9 broth (Becton Dickinson) supplemented with  
341 albumin-dextrose-catalase enrichment (Becton Dickinson), 0.2% glycerol, 0.05% Tween 80 or on  
342 Middlebrook 7H11 agar (Becton Dickinson) containing 10% v/v oleic acid-albumin-dextrose-  
343 catalase enrichment (Becton Dickinson) and 0.2% glycerol. 10 mg of FX11 (Merck Millipore)  
344 was dissolved in 1 mL of dimethyl sulfoxide (DMSO).

345 **Growth assay:** Bacterial growth (with 5% DMSO or 14.3  $\mu$ M FX11) was assessed in minimal  
346 medium (0.5 g/liter asparagine, 1 g/liter  $\text{KH}_2\text{PO}_4$ , 2.5 g/liter  $\text{Na}_2\text{HPO}_4$ , 50 mg/liter ferric  
347 ammonium citrate, 0.5 g/liter magnesium sulfate, 0.5 mg/liter calcium chloride, and 0.1 mg/liter  
348 zinc sulfate) containing either 0.2% glycerol (vol/vol), or 0.5% glucose (wt/vol), 0.01%  
349 cholesterol (wt/vol), 10mM sodium L-lactate. Cell densities (OD) were measured at 600 nm by  
350 using a cell density meter (BioChrome Biowave). Infection stocks were prepared from mid-log  
351 phase *M. tuberculosis* cultures. For CFU determinations, serial dilutions were performed in  
352 PBS/0.05% Tween 80 and plated onto Middlebrook 7H11 agar. Plates were incubated at 37 °C  
353 for 4–5 weeks prior to CFU counting. For fluorescent-based-measurement, black, optical-bottom,  
354 96-well microplates was used and fluorescence measured with a GloMax<sup>®</sup> Microplate Multimode  
355 Reader using “Blue” filter (Excitation: 490 nm, Emission: 510–570 nm).

356 **Drugs, formulations and administration.** FX11 (Merck Millipore) or INH (Sigma) were  
357 formulated in 0.4% methylcellulose. The final concentration of DMSO did not exceed 2%. Drug  
358 formulations were prepared every week and stored at 4 °C. Drugs were administered by oral  
359 gavage (0.2 ml) on 6 days per week.

360 **Ethical statement.** All animal studies have been ethically reviewed and approved by the State  
361 Office for Health and Social Services, Berlin, Germany. Experimental procedures were carried  
362 out in accordance with the European directive 2010/63/EU on Care, Welfare and Treatment of  
363 Animals.

364 **Animal experiments.** Female C5BL/6J and C57BL/6J *Nos2*<sup>-/-</sup> mice were bred in-house and  
365 maintained under specific pathogen-free conditions. Six- to eight-week-old C5BL/6J mice were  
366 aerosol infected with 100 CFU *M. tuberculosis* H37Rv. C5BL/6J *Nos2*<sup>-/-</sup> mice were infected as  
367 previously reported (2). In brief, six- to eight-week-old female C5BL/6J *Nos2*<sup>-/-</sup> mice were  
368 anesthetized (ketamine 65mg/kg, acepromazine 2 mg/kg, xylazine 11 mg/kg) and infected with  
369 1,000 CFU of *M. tuberculosis* in 20 µl PBS given into the ear dermis. At 14 and 21 days post-  
370 infection each mouse received 0.5mg of monoclonal anti-tumour necrosis factor alpha antibody  
371 (purified from MP6-XT22 cultures) by intraperitoneal (i.p.) injection. Two hours before  
372 euthanasia animals received 60mg/kg pimonidazole hydrochloride (Hypoxyprobe™-1,  
373 Burlington, MA, USA) i.p. to allow for detection of hypoxic regions in organ sections.

374 **Staining procedures and histopathology.** The left lung lobe of mice was removed aseptically  
375 and post-fixed in 4% paraformaldehyde for 16–20 h at room temperature. The tissue was then  
376 dehydrated and paraffin-embedded (60 °C) using a Leica TP 1020 tissue processor. Paraffin  
377 blocks were cut at 2-3 µm, sections were mounted and dried on Superfrost Plus slides (Thermo  
378 Scientific) avoiding temperatures above 37 °C. After dewaxing and rehydration, sections were  
379 subjected to haematoxylin and eosin (H&E) staining, or fluorescence staining to detect LDHA  
380 expression, pimonidazole and *M. tuberculosis* in tissues. Sections were stained with  
381 hematoxylin/eosin using standard protocols. Central necrosis of lesions was defined as a lighter  
382 pink region indicating tissue consolidation surrounded by granulomatous inflammatory

383 infiltrates. Researcher blinded to the study groups scored at least 4 individual stained sections of  
384 each organ in study groups of five mice per time point.

385 For immunostaining, sections were incubated in one of the heat-induced epitope retrieval (HIER)  
386 buffers (pH 6, citrate) for 20 min at 96 °C in a steam cooker (Braun). After antigen retrieval,  
387 sections were left in the same HIER buffer at room temperature to cool below 30 °C. Sections  
388 were further rinsed three times with deionized water and once with Tris-buffered saline (TBS,  
389 Pierce Protein-Free Blocking Buffer (pH7.4)). Subsequently sections were permeabilized for 5  
390 min with 0.5% Triton X100 in TBS at room temperature, followed by three rinsing steps with  
391 TBS. Sections were surrounded with PAP pen and treated with TBS blocking buffer for 30 min to  
392 prevent non-specific binding. Primary antibodies were diluted in TBS blocking buffer and  
393 incubated on the sections over night at room temperature.

394 Following antibodies were used for immunostaining: Anti-*Mycobacterium tuberculosis* antibody  
395 (Abcam, ab905), Anti-LDHA antibody (Abcam ab101562 LOT GR176934), anti-pimonidazole  
396 (PIMO) primary antibody is FITC-conjugated (included in kit), secondary detection of PIMO is  
397 carried out using goat anti-FITC (Abcam ab19224 LOT GR175456-35) followed by donkey anti-  
398 goat Alexa 488 (Dianova 705-546-147). The following antigen retrieval solutions were used: R-  
399 Universal Buffer pH7, 10× (Aptum APO 0530500), Target Retrieval Solution pH9 10mM Tris  
400 (TRS) 10× (Dako S236784), and Target Retrieval Solution pH6 10mM Citrate 10× (Dako  
401 S236984-3). Dilution and blocking buffer were TBS supplemented with 1% BSA/2% donkey  
402 NS/5% cold water fish gelatin/0.05% Tween 20/0.05%Triton X100.

403 Fluorescence images were recorded using a Leica SP8 confocal or a Leica DMR widefield  
404 microscope (equipped with bandpass filter blocks and a Jenoptik ProgRes MF USB camera).  
405 Complete tissue sections were digitized using a ZEISS Axioscan Z1 slide scanner.

406 **Bacterial enumeration from lungs and spleens.**

407 Mice were euthanized at dedicated time points and superior, middle inferior and post-caval lobes  
408 were removed and homogenized in 1ml PBS/0.05% Tween 80. Serial dilutions of organ  
409 homogenates were plated onto Middlebrook 7H11 agar and in addition on agar supplemented  
410 with 0.4% activated charcoal for all time points during chemotherapy. Plates showing higher  
411 CFU counts were used for data analysis.

412 **Isolation of bone marrow derived macrophages (BMDMs)**

413 BMDMs was obtained from tibia and femur bones and maintained in Dulbecco's Modified Eagle  
414 Medium containing 20% L929-cell supernatant, 10% heat-inactivated FCS, 5% heat-inactivated  
415 HS, 2 mM glutamine. Differentiated resting cells and cells pretreated with recombinant mouse  
416 IFN- $\gamma$  (100 U/ml; Strathmann Biotech AG) were infected with *M. tuberculosis* H37Rv at MOI  
417 1:5.

418 **Extracellular flux analysis**

419 Seahorse Xfp extracellular flux analyzer (Agilent, Santa Clara, CA) was used to measure oxygen  
420 consumption (OCR) of *M. tuberculosis* cells as described earlier (3,4) and Seahorse XF96  
421 extracellular flux analyzer (Agilent, Santa Clara, CA) was used to measure oxygen consumption  
422 (OCR) and extracellular acidification rates (ECAR) of murine BMDM cells as per manufactures  
423 recommendation. Cells were seeded into the XF96 cell culture plate at cell densities of 70000  
424 cells/well and rested for 24 h. Subsequently cells were stimulated with IFN- $\gamma$  (100 U/ml) for  
425 further 24 h at 37 °C /7% CO<sub>2</sub>.

426 Mitochondrial respiration assay (Seahorse XF cell mito stress test) and glycolytic function assay  
427 (Seahorse XF Glycolysis Stress Test) were performed according to the manufacture's

428 recommendation. Data analysis was carried out using The Wave Desktop 2.6 Software (available  
 429 at <https://www.agilent.com/en/products/cell-analysis/software-download-for-wave-desktop>) and  
 430 the XF Report Generators for calculation of the parameters from the respective assays.  
 431 Assay principle, design, and equations to calculate each of the parameters is schematically  
 432 illustrated below using the representative data obtained in this study. A more detailed account of  
 433 these assays can be accessed from the manufacturer's web resources.

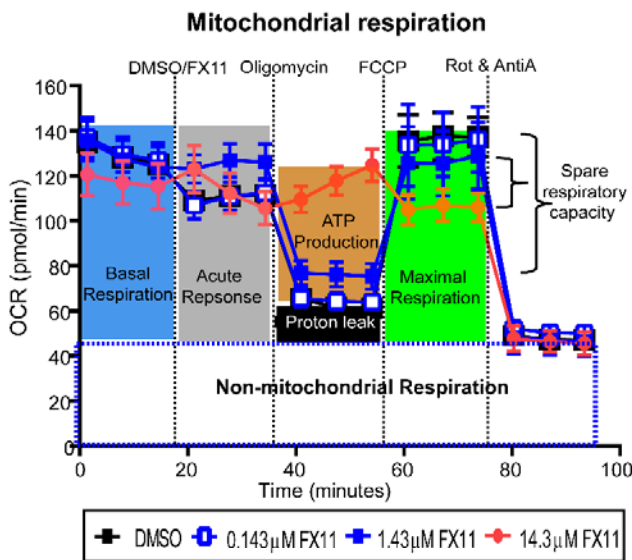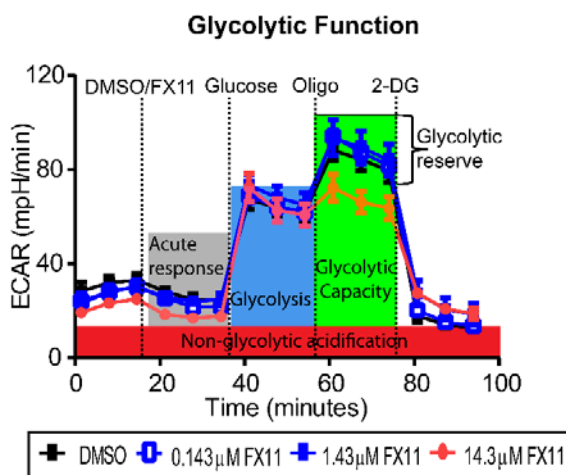

434

435

436 **Assay type, injection sequence of modulators used in this study.**

437 **Mitochondrial respiration assay:**

| <b>Mitochondrial respiration</b> |                                                              |                                                                                                         |                                                                                                                                        |
|----------------------------------|--------------------------------------------------------------|---------------------------------------------------------------------------------------------------------|----------------------------------------------------------------------------------------------------------------------------------------|
|                                  | <b>Compound</b>                                              | <b>Function</b>                                                                                         | <b>Effect on OCR</b>                                                                                                                   |
| <b>Basal respiration</b>         | Not applicable                                               | -                                                                                                       | To monitor the cellular energetic demand under baseline conditions.                                                                    |
| <b>Injection 1</b>               | DMSO or FX11                                                 | Lactate dehydrogenase A inhibitor solubilized in DMSO.                                                  | Test compound                                                                                                                          |
| <b>Injection 2</b>               | Oligomycin mixture                                           | Inhibitor of ATP synthase V of ETC                                                                      | A decrease in OCR correlates cellular ATP generation to with mitochondrial respiration.                                                |
| <b>Injection 3</b>               | Carbonyl cyanide-4 (trifluoromethoxy) phenylhydrazone (FCCP) | Uncoupling agent results in maximum oxygen consumption rate by collapsing inner mitochondrial membrane. | An increase in OCR levels indicates maximum respiration capacity of cell.                                                              |
| <b>Injection 4</b>               | Rotenone and antimycin A                                     | Inhibitor of complexes I and III of ETC                                                                 | A decrease in OCR correlates with shut down of mitochondrial respiration. Cellular respiration is driven by non-mitochondrial process. |

438

439

440

441

442

443

444 **Glycolytic stress assay:** Glucose is converted to pyruvate, and subsequently to lactate, results in  
 445 proton generation and extrusion that acidify the extracellular medium (recorded as ECAR). This  
 446 test was carried out to determine the impact of FX11 on ECAR values of BMDMs when  
 447 sequentially treated with different glycolytic modulators.

|                            | <b>Glycolytic stress</b> |                                                                                                                         |                                                                                                                                       |
|----------------------------|--------------------------|-------------------------------------------------------------------------------------------------------------------------|---------------------------------------------------------------------------------------------------------------------------------------|
|                            | <b>compound</b>          | <b>function</b>                                                                                                         | <b>effect on ECAR</b>                                                                                                                 |
| <b>Basal acidification</b> | Not applicable           | -                                                                                                                       | Base line reading to assess non-glycolytic acidification                                                                              |
| <b>Injection 1</b>         | DMSO or FX11             | Lactate dehydrogenase A inhibitor solubilized in DMSO.                                                                  | Test compound                                                                                                                         |
| <b>Injection 2</b>         | Glucose                  | Glycolytic substrate. Glucose catabolism result in pyruvate and lactate and subsequent extracellular release of protons | An increase in ECAR value correlates with rate of glycolysis                                                                          |
| <b>Injection 3</b>         | Oligomycin mixture       | Inhibitor of mitochondrial ATP synthase. Upon inhibition, cells are increasingly dependent on glycolysis.               | Further increase in ECAR value correlates with maximum glycolytic capacity of the cell (in the absence of oxidative phosphorylation). |
| <b>Injection 4</b>         | 2-deoxyglucose (2-DG)    | Inhibitor of glucose hexokinase which mediates first step of glycolysis                                                 | A decrease in ECAR value implies that the ECAR produced in the experiment is due to glycolysis.                                       |

448

449 **References:**

- 450 1. Cosma CL, Klein K, Kim R, Beery D, Ramakrishnan L. *Mycobacterium marinum* Erp is a  
 451 virulence determinant required for cell wall integrity and intracellular survival. 2006.  
 452 *Infect Immun* 74:3125-33.
- 453 2. Gengenbacher M, Duque-Correa MA, Kaiser P, Schuerer S, Lazar D, Zedler U, Reece  
 454 ST, Nayyar A, Cole ST, Makarov V. 2017. NOS2-deficient mice with hypoxic  
 455 necrotizing lung lesions predict outcomes of tuberculosis chemotherapy in humans. *Sci*  
 456 *Rep* 7:8853. <https://doi.org/10.1038/s41598-017-09177-2>.
- 457 3. Lamprecht DA, Finin PM, Rahman MA, Cumming BM, Russell SL, Jonnala SR,  
 458 Adamson JH, Steyn AJ. 2016. Turning the respiratory flexibility of *Mycobacterium*  
 459 *tuberculosis* against itself. *Nat Commun* 7:12393. <https://doi.org/10.1038/ncomms12393>.
- 460 4. Krishnamoorthy G, Kaiser P, Lozza L, Hahnke K, Mollenkopf HJ, Kaufmann SHE. 2019.  
 461 Mycofactocin is associated with ethanol metabolism in mycobacteria. mBio In press.

462 **TEXT S2: Linear regression modelling analysis to determine the effect of FX11 on bone**  
463 **marrow derived macrophages bioenergetics and glycolytic response.**

464 **Data acquisition:** Oxygen consumption (OCR) and extracellular acidification rates (ECAR) were  
465 measured using the Seahorse XF96 extracellular flux analyzer (Agilent, Santa Clara, CA). Two  
466 different assays were performed using the XF96: mitochondrial respiration assay, and glycolytic  
467 stress assay. Acquired real-time data were into the XF Report Generators using the Wave  
468 Desktop 2.6 software for calculation of the parameters from the specific assays.

469 **Results:**

470 **1. Respiratory profile and respiratory parameters of BMDMs treated with FX11 or DMSO**  
471 **(vehicle control).**

472 **1.1. Box plots showing respiratory response (OCR value) stratified by experiment replicate (related**  
473 **to Fig. 1A and B).**

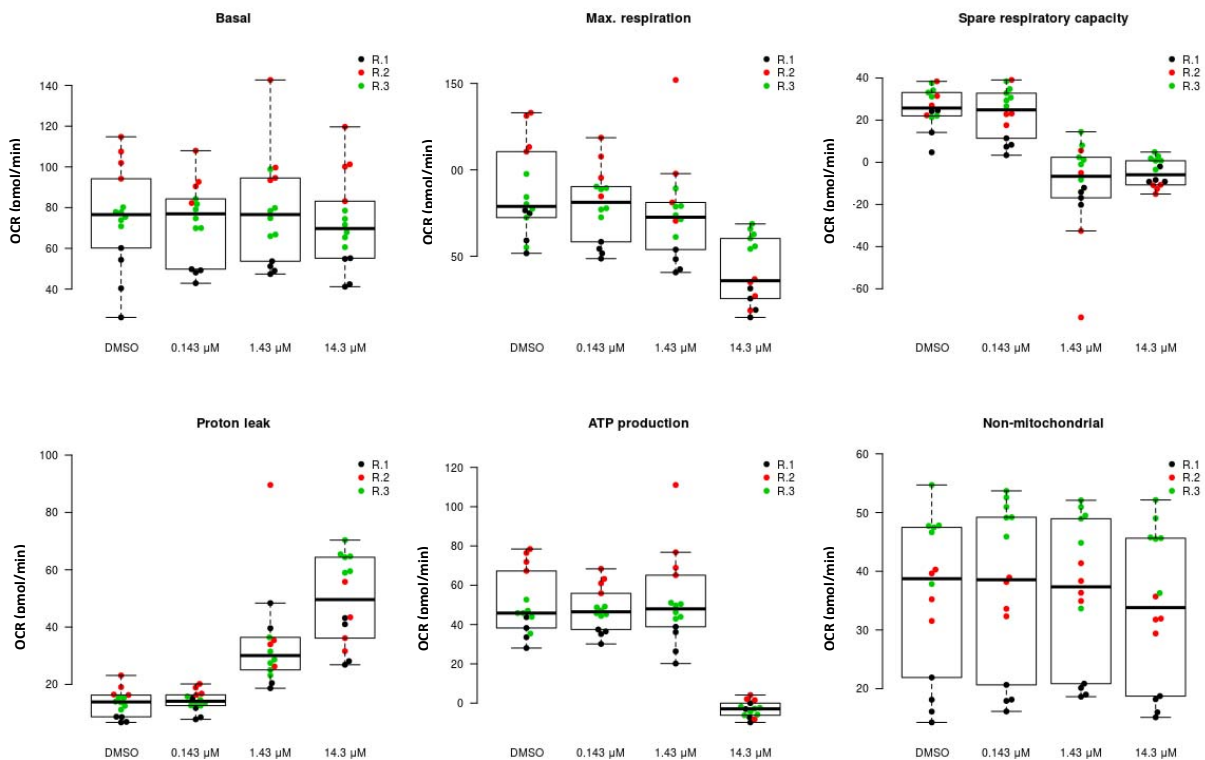

474

475

476

477



478 **1.2. Linear regression models for each of the six parameters (see above box plots in 1.1)**

479 For each parameter (readout), the influence of FX11 concentration on the parameter readout was tested  
 480 using log-linear regression. To this end, the FX11 concentrations were logarithmized (with the control,  
 481 DMSO, assumed to have a concentration below 0.0143 mM) and a linear model (lm) was fit on the  
 482 resulting data with the lm() function in R.

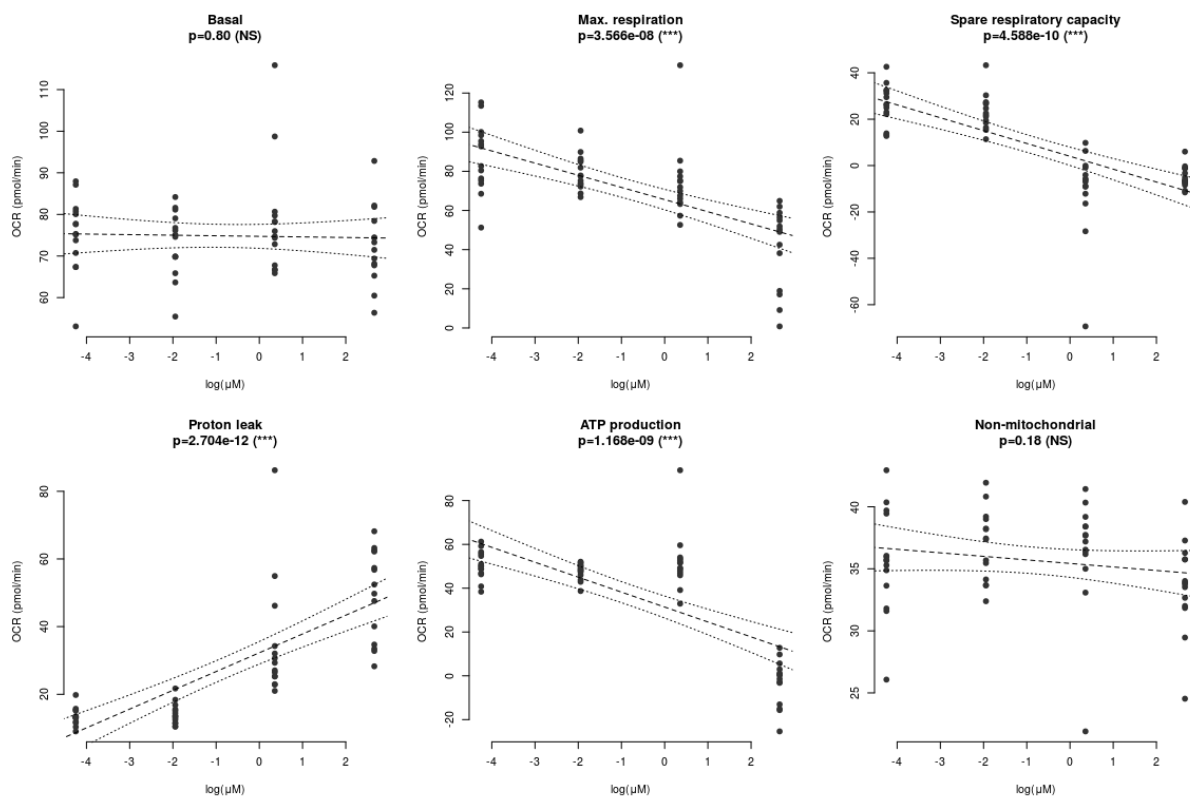

483  
 484 **1.3. Linear regression modeling results (related to respiratory parameters presented in Fig. 1A and**  
 485 **B).**

| Parameter                  | P values        |
|----------------------------|-----------------|
| Basal                      | 0.80 (NS)       |
| Max. respiration           | 6.403e-08 (***) |
| Spare respiratory capacity | 9.652e-10 (***) |
| Proton leak                | 6.864e-12 (***) |
| ATP production             | 2.375e-09 (***) |
| Non-mitochondrial          | 0.18 (NS)       |

486

487

488 **2. Glycolytic stress profile and glycolytic parameters of BMDMs-treated with FX11 or**  
489 **DMSO (vehicle control).**

490 **2.1. Box plots showing glycolytic response (ECAR value) stratified by experiment replicate**  
491 **(related to Fig. 1C and D).**

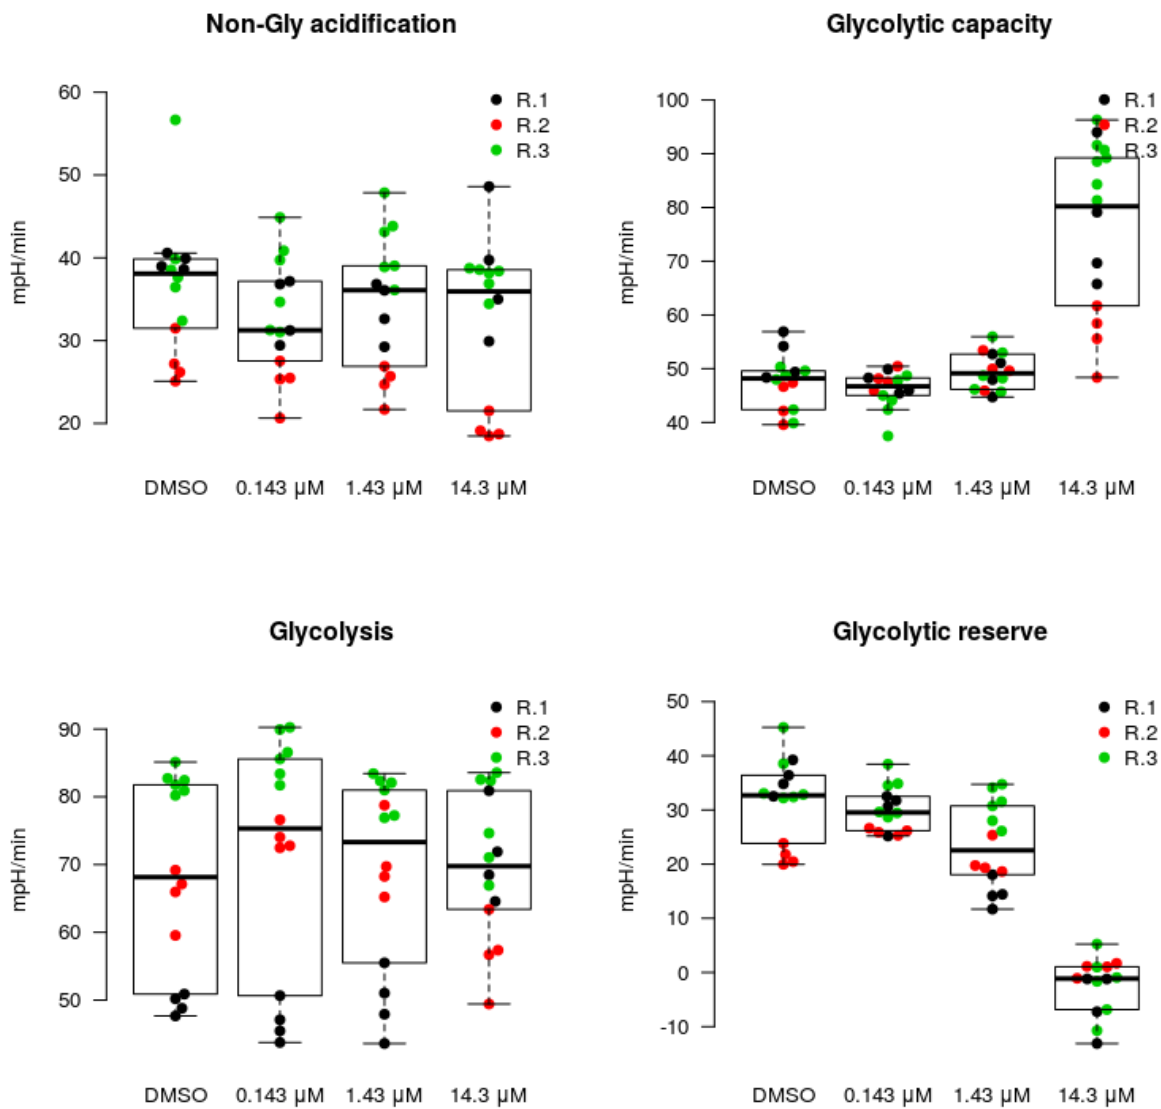

492

493

494

495

496 **2.2. Linear regression models for each of the four outputs collected (see above box plots in 2.1.)**

497 For each parameter (readout), the influence of FX11 concentration on the parameter readout was tested  
498 using log-linear regression. To this end, the FX11 concentrations were logarithmized (with the control,  
499 DMSO, assumed to have a concentration below 0.0143 mM) and a linear model (lm) was fit on the  
500 resulting data with the lm() function in R.

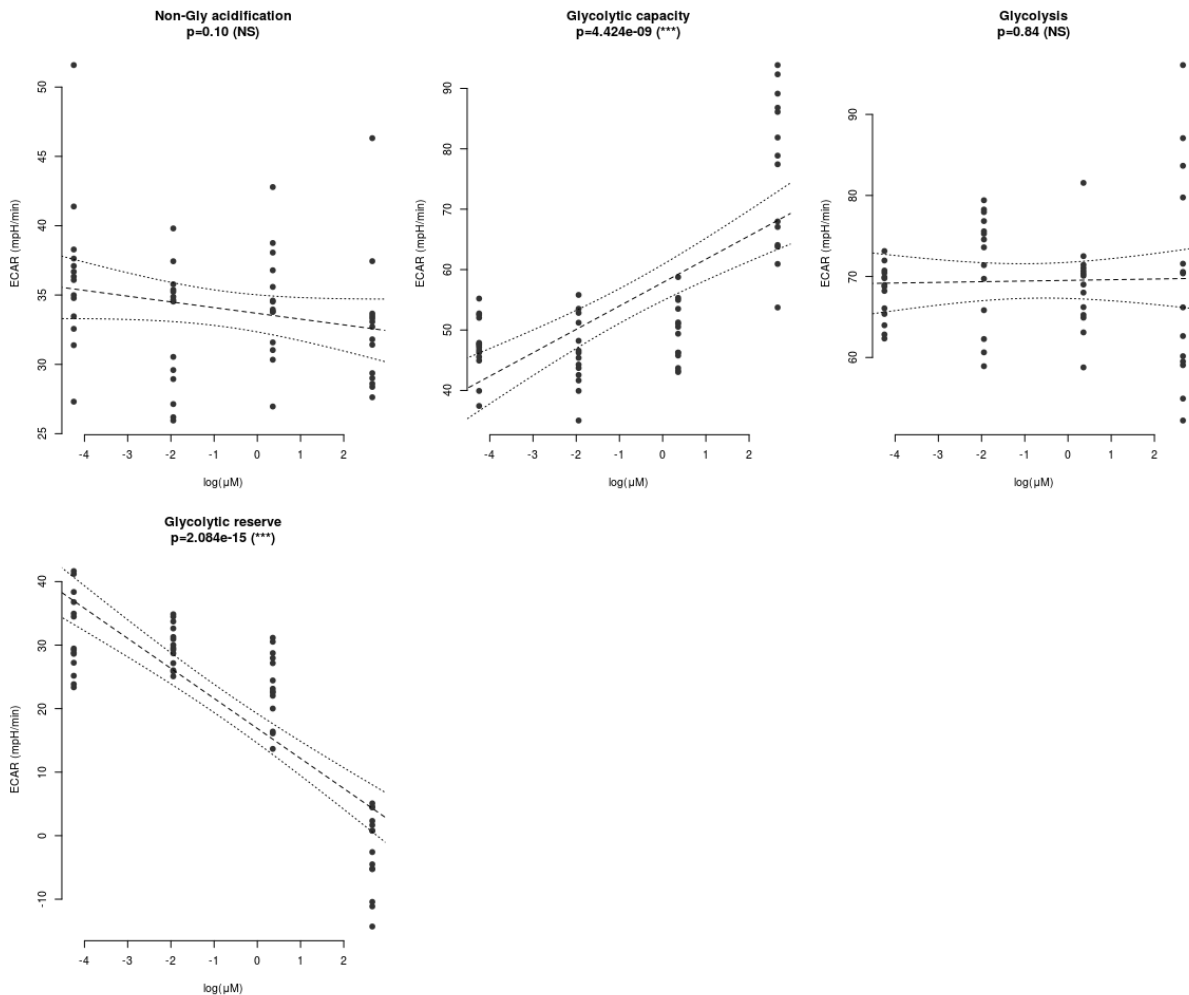

501

502

503 **2.3 Linear regression modeling results (related to glycolytic function parameters presented in**  
504 **Fig. 1C and D).**

| Parameter             | P values        |
|-----------------------|-----------------|
| Non-Gly acidification | 0.11 (NS)       |
| Glycolytic capacity   | 8.569e-09 (***) |
| Glycolysis            | 0.85 (NS)       |
| Glycolytic reserve    | 6.883e-15 (***) |

505
